# Supplementary material
Source: MDPI journal article supplement (https://www.mdpi.com/2073-4395/12/7/1530)
Supplement: s1 [file s1]

**Supplementary Table S1.** Summary of soil physicochemical properties of Lanzhou: the data have been published [11]; the significance is 0.05 for lower letters (a, b, c) presented in table

| Treatment | pH                       | Organic Matter<br>(g kg <sup>-1</sup> ) | Alkali-Hydrolyzable<br>Nitrogen<br>(mg kg <sup>-1</sup> ) | Available<br>Phosphorus<br>(mg kg <sup>-1</sup> ) | Available<br>Potassium<br>(mg kg <sup>-1</sup> ) | Available<br>Silicon (mg kg <sup>-1</sup> ) |
|-----------|--------------------------|-----------------------------------------|-----------------------------------------------------------|---------------------------------------------------|--------------------------------------------------|---------------------------------------------|
| CK        | 8.27 ± 0.02 <sup>a</sup> | 17.00 ± 0.39 <sup>b</sup>               | 44.69 ± 1.22 <sup>b</sup>                                 | 50.87 ± 0.58 <sup>c</sup>                         | 234.26 ± 3.40 <sup>c</sup>                       | 109.34 ± 2.13 <sup>c</sup>                  |
| SF        | 8.25 ± 0.01 <sup>a</sup> | 18.02 ± 0.13 <sup>b</sup>               | 52.14 ± 2.03 <sup>a</sup>                                 | 32.97 ± 0.40 <sup>b</sup>                         | 249.48 ± 2.11 <sup>ab</sup>                      | 121.31 ± 1.02 <sup>b</sup>                  |
| MF        | 8.23 ± 0.01 <sup>a</sup> | 20.07 ± 0.29 <sup>a</sup>               | 51.28 ± 3.00 <sup>a</sup>                                 | 53.00 ± 0.28 <sup>b</sup>                         | 246.44 ± 1.09 <sup>b</sup>                       | 118.99 ± 0.79 <sup>b</sup>                  |
| SMF       | 8.18 ± 0.01 <sup>b</sup> | 19.30 ± 0.49 <sup>a</sup>               | 51.07 ± 1.54 <sup>a</sup>                                 | 61.91 ± 0.41 <sup>a</sup>                         | 257.67 ± 4.31 <sup>a</sup>                       | 128.66 ± 1.75 <sup>a</sup>                  |
